# Supplementary material for: Influence of Slag-Based Geopolymer Concrete on the Seismic Behavior of Exterior Beam Column Joints
Source: MDPI journal article supplement (doi:10.3390/su15032327), 2023-01-27
Supplement: s1 [file s1]

Archive with 1 entries (1 files):
- sustainability-2122082-supplementary.pdf
