# Supplementary material for: Influence of Slag-Based Geopolymer Concrete on the Seismic Behavior of Exterior Beam Column Joints
Source: MDPI journal article supplement (doi:10.3390/su15032327), 2023-01-27
Supplement: s1 [file s1 › sustainability-2122082-supplementary.pdf]

## Annexure I

### Mix Design for M30 Grade of Geopolymer Concrete

1. Characteristic compressive strength of Geopolymer Concrete ( $f_{ck}$ ) = 30 MPa.
2. Fly ash: Fineness in terms of specific surface:  $235\text{m}^2/\text{kg}$
3. Alkaline activators ( $\text{Na}_2\text{SiO}_3$  and  $\text{NaOH}$ )
  - (a) Concentration of Sodium hydroxide in terms of molarity: 8 M
  - (b) Concentration of Sodium silicate solution: 50.32 % solid content
4. Solution-to-fly ash ratio by mass: 0.5
5. Sodium silicate-to-sodium hydroxide ratio by mass: 1: 2.5
6. Fine aggregate

Natural river sand conforming to grading zone-III as per IS 383  
Specific gravity = 2.52
7. Coarse aggregate

Type: Crushed/angular  
Maximum size: 12.5 - 20 mm  
Specific gravity = 2.75

### MIX DESIGN

#### 1. Target mean strength

$$F_{ck} = 38.25 \text{ MPa}$$

#### 2. Selection of quantity of fly ash

From Fig shown below, the quantity of fly ash required is  $500 \text{ kg/m}^3$  for the target mean strength of 38.25 MPa at solution-to-fly ash ratio of 0.35 and for  $265\text{m}^2/\text{kg}$  fineness of fly ash

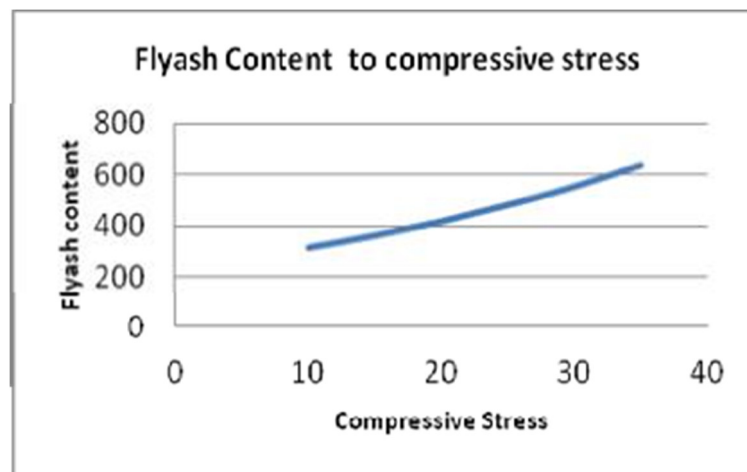

#### 3. Calculation of the quantity of alkaline activators

Calculate the quantity of alkaline activators considering:

Solution / Fly ash ratio by mass = 0.5

i.e: Mass of ( $\text{Na}_2\text{SiO}_3 + \text{NaOH}$ )/Fly ash = 0.5

Mass of ( $\text{Na}_2\text{SiO}_3 + \text{NaOH}$ )/500 = 0.5

Mass of ( $\text{Na}_2\text{SiO}_3 + \text{NaOH}$ ) =  $252 \text{ kg/m}^3$

Take the sodium silicate-to-sodium hydroxide ratio by mass of 1:2.5

Mass of sodium hydroxide solution ( $\text{Na}_2\text{SiO}_3$ ) =  $180 \text{ kg/m}^3$

Mass of sodium silicate solution ( $\text{NaOH}$ ) =  $72 \text{ kg/m}^3$

#### 4. Calculation of total solid content in alkaline solution

Molarity Used = 8 M (8X 40 = 320 g of NaOH in 680g of water)  
Solid content in the NaOH solution is 23.04 kg/m<sup>3</sup> (320g in 1000g)  
Water content in the NaOH solution is 48.96 kg/m<sup>3</sup> (72 – 23.04)  
Water content in the Na<sub>2</sub>SiO<sub>3</sub> solution is 63.0 kg/m<sup>3</sup> (0.35 X 180)  
Solid content in the Na<sub>2</sub>SiO<sub>3</sub> solution is 117.0 kg/m<sup>3</sup>

#### 5. Selection of water content

For very high degree of workability and fineness of fly ash of 265 m<sup>2</sup>/kg, water content per cubic meter of geopolymer concrete is selected from the below Table

| Degree of workability | Quantity of water required in kg/m <sup>3</sup> |         |         |      |
|-----------------------|-------------------------------------------------|---------|---------|------|
|                       | Fineness of fly ash in m <sup>2</sup> /kg       |         |         |      |
|                       | <300                                            | 300–400 | 400–500 | >500 |
| Low                   | 80                                              | 85      | 100     | 110  |
| Medium                | 90                                              | 95      | 110     | 120  |
| High                  | 100                                             | 110     | 120     | 135  |
| Very high             | 120                                             | 130     | 140     | 160  |

Water content per cubic meter of concrete from

Hence Water content = 120 kg/m<sup>3</sup>

#### 6. Adjustment in water content

For sand conforming to grading-III, correction in water content is taken from following Table

| Grading zone of fine aggregate as per IS 383 | Correction in water content (%) |
|----------------------------------------------|---------------------------------|
| Zone-I                                       | –1.5                            |
| Zone-II                                      | –                               |
| Zone-III                                     | +1.5                            |
| Zone-IV                                      | +3                              |

Adjustment in water content = +1.5

Total quantity of water required = 120 + 1.5 = 121.5 kg/m<sup>3</sup>

Water content in alkaline solutions = 111.96 kg/m<sup>3</sup>

#### 7. Additional Water Content

= [Total quantity of water] – [Water present in alkaline solutions]

= 121.5 – 111.96 = 9.54 kg/m<sup>3</sup>

#### 8. Aggregate content:

Assuming the sand content in total volume to be 38.5% and entrapped air as 2%

Using the below formulae the aggregate contents are found out

$VF = ((S_0/S_{s0}) + (S/S_s) + (F/S_f) + ((1/P) \times (F_a/SF_a))) \times (1/1000)$

$VC = ((S_0/S_{s0}) + (S/S_s) + (F/S_f) + ((1/P) \times (C_a/SC_a))) \times (1/1000)$

Where,

$VF$  &  $VC$  = Absolute volume of fresh concrete, which is equal to gross volume minus the volume of entrapped air = 0.98

$S$  = Sodium Silicate Solution (kg) per  $\text{m}^3$  of concrete = 180

$SO$  = Sodium Hydroxide Solution (kg) per  $\text{m}^3$  of concrete = 72

$F$  = Weight of Flyash (kg) per  $\text{m}^3$  of concrete = 500

$S_F$  = Specific gravity of Flyash = 2.3

$P$  = Ratio of fine aggregate to total aggregate by absolute volume = 0.385

$F_a$  &  $C_a$  = Total masses of fine aggregate and coarse aggregate (kg) per  $\text{m}^3$  of concrete respectively = To find

$S_{F_a}$  &  $S_{C_a}$  = Specific gravity of saturated surface dry fine aggregate and coarse

aggregate respectively = 3.47 & 3.88

$S_s$  = Specific gravity of Sodium Silicate solution = 1.53

$S_{SO}$  = Specific gravity of Sodium hydroxide solution = 1.47

Substituting in above equations,

We get,

$VF = 796.49 = 800 \text{ kg/m}^3$

$VC = 1422.65 = 1425 \text{ kg/m}^3$

#### MIX PROPORTION

| Ingredients of geopolymer concrete | Fly ash | NaOH | Na <sub>2</sub> SiO <sub>3</sub> | Sand | Coarse aggregate | Total water (W/GPB) | Extra water |
|------------------------------------|---------|------|----------------------------------|------|------------------|---------------------|-------------|
| Quantity ( $\text{kg/m}^3$ )       | 500     | 72   | 180                              | 800  | 1425             | 138                 | 26.04       |
| Proportion                         | 1       | 0.5  |                                  | 1.6  | 2.85             | 0.276               | 0.05        |
